# Supplementary material for: Mice lacking mitochondrial ferritin are more sensitive to doxorubicin-mediated cardiotoxicity
Source: PubMed Central journal article supplement (PMC4118045; doi:10.1007/s00109-014-1147-0), 2014-04-13
Supplement: 109_2014_1147_MOESM1_ESM.pdf [file 109_2014_1147_MOESM1_ESM.pdf]

J Mol Med 2014, Mice lacking mitochondrial ferritin are more sensitive to Doxorubicin-mediated cardiotoxicity, By Maccarinelli F, Gammella E, Asperti M, Regoni M, Biasiotta G, Turco E, Altruda F, Lonardi S, Cornaghi L, Donetti E, Recalcati S, Poli M, Finazzi D, Arosio P, Cairo G.

## Supplementary

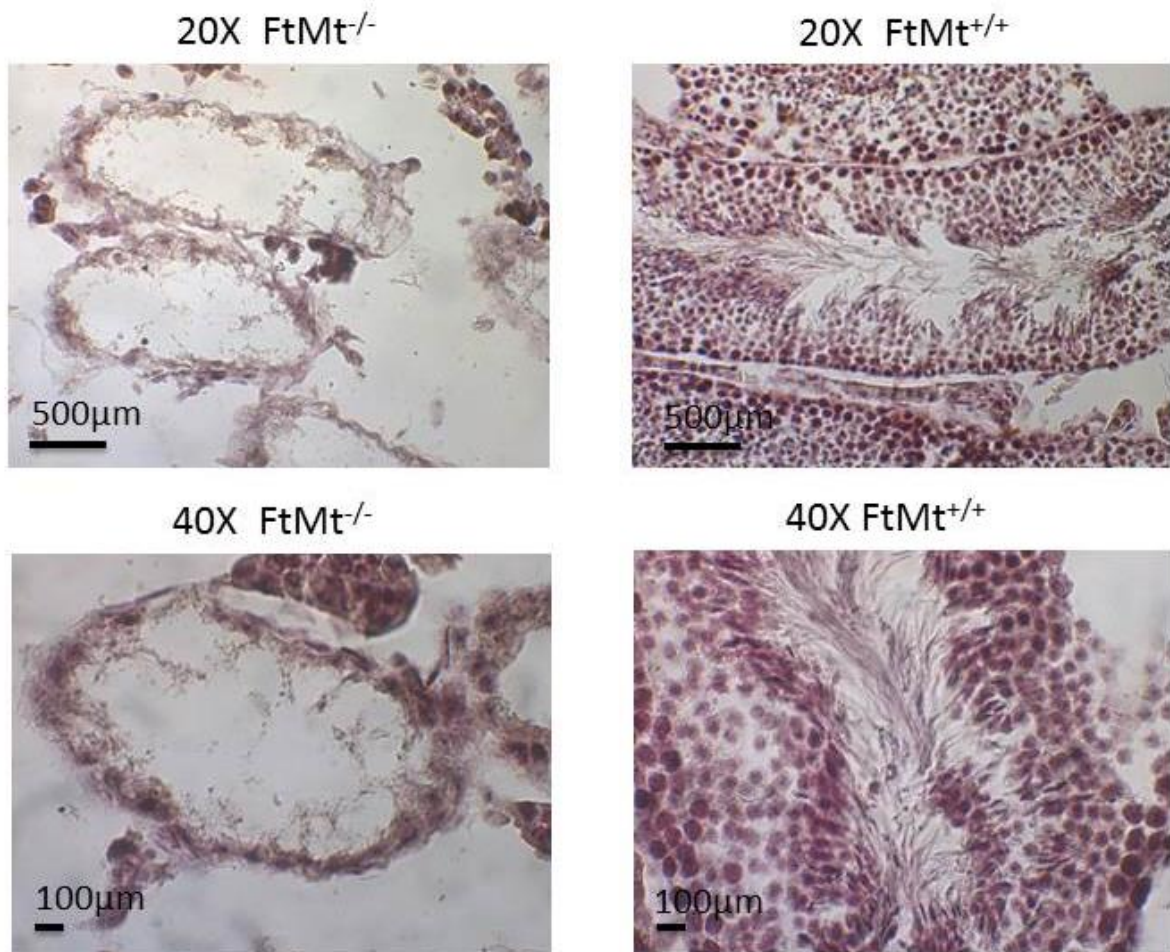

**Fig. S1. The testis of  $FtMt^{-/-}$  mice are more sensitive to Doxorubicin than those of wild type mice.** Histology of the testis of mice sacrificed 30 days after treatment with 15 mg/kg Doxorubicin. The morphology of  $FtMt^{+/+}$  mice appears unaffected by the treatment, while in the  $FtMt^{-/-}$  spermatocytes are almost completely absent.

Fig. S1
